# Supplementary material for: Pharmacovigilance during treatment of multiple sclerosis: early recognition of CNS complications
Source: HighWire-hosted journal article supplement (doi:10.1136/jnnp-2020-324534), 2020-11-23
Supplement: jnnp-2020-324534supp001_data_supplement.pdf [file jnnp-2020-324534supp001_data_supplement.pdf]

### **Search strategy and selection criteria**

References for this review were identified by reviewing our personal files and searches of PubMed for manuscripts in English between January 1, 1990 and July 6, 2020, with the terms “multiple sclerosis”, “treatment/therapy”, and “magnetic resonance imaging OR MRI” and assorted combinations of the following terms: “pharmacovigilance”, “adverse event”, “infection”, “progressive multifocal leukoencephalopathy OR PML”, “viral/virus”, “meningitis”, “encephalitis”, and all discussed adverse events. We reviewed reference lists of relevant articles and review articles for additional references. The final reference list was generated on the basis of originality, recency and relevance to the scope of this review article.
